# Supplementary material for: Mutation Rate Switch inside Eurasian Mitochondrial Haplogroups: Impact of Selection and Consequences for Dating Settlement in Europe
Source: PubMed Central journal article supplement (PMC3125290; doi:10.1371/journal.pone.0021543), 2011-06-28

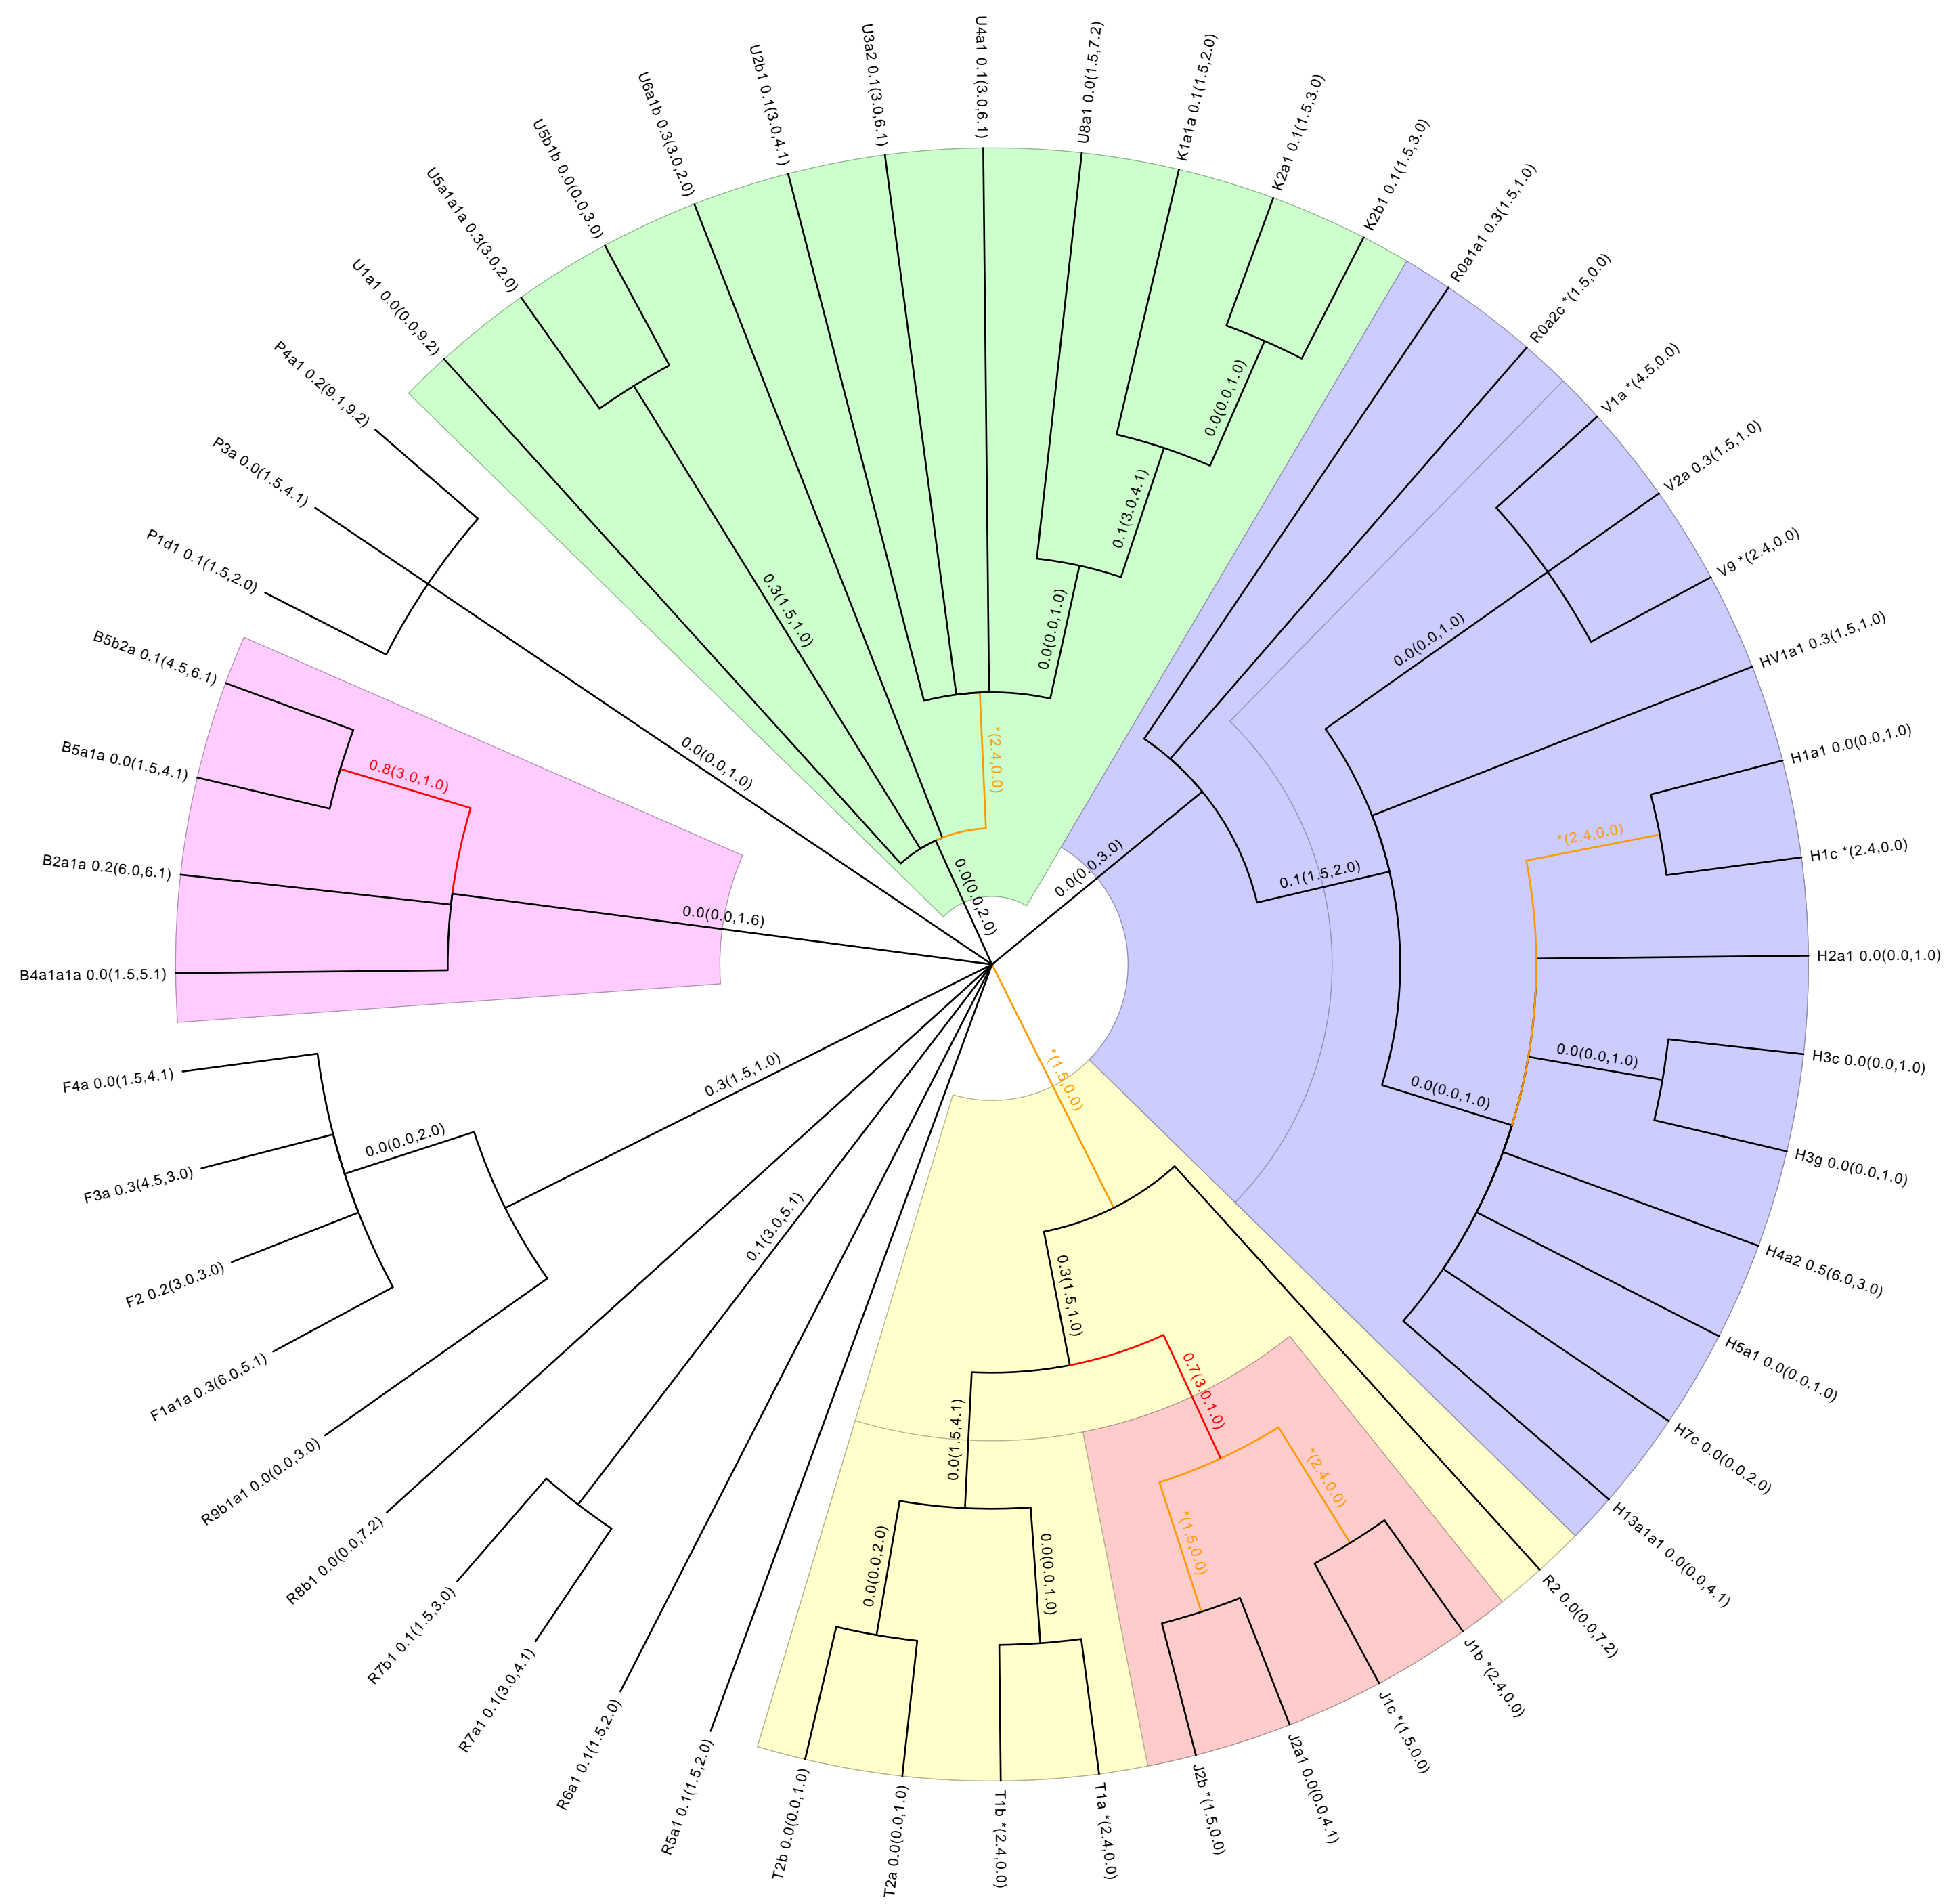

Supplement: pone.0021543.s001.pdf [file pone.0021543.s001.pdf]
